# Supplementary material
Source: PubMed Central journal article supplement (PMC10500435)
Supplement: jamapsychiatry-e232696-s002.pdf [file jamapsychiatry-e232696-s002.pdf]

## Data Sharing Statement

Korchia. Sexual Dysfunction in Schizophrenia. *JAMA Psychiatry*. Published September 13, 2023. doi:10.1001/jamapsychiatry.2023.2696

### Data

**Data available:** Yes

**Data types:** Data (not involving human participants)

**How to access data:** data are available on request to the author Laurent Boyer  
laurent.boyer@ap-hm.fr

**When available:** With publication

### Supporting Documents

**Document types:** None

### Additional Information

**Who can access the data:** researchers whose proposed use of the data has been approved

**Types of analyses:** for a specified research purpose

**Mechanisms of data availability:** with a signed data access agreement
